# Supplementary material
Source: publisher figshare collection journal article supplement (https://frontiersin.figshare.com/ndownloader/files/12431612)
Supplement: Supplementary file [file 12431612]

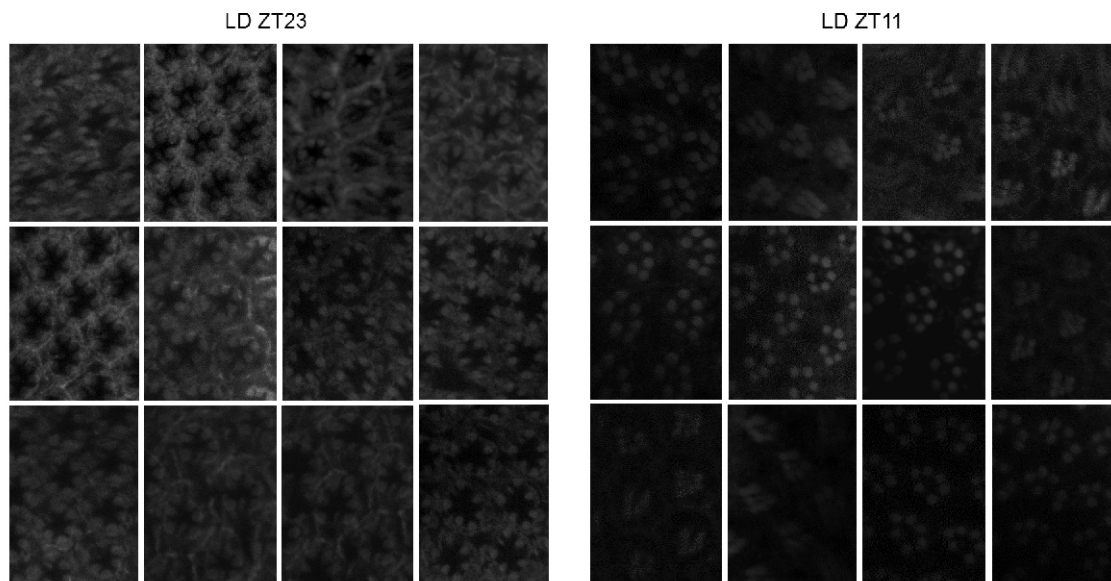

**Figure S5. CRY staining in the retina of wildtype flies kept under regular 12:12 h light-dark cycles.**

12 retinas of flies killed one hour before lights-on (ZT23) and one hour before lights-off (ZT11) are shown, respectively. Note that cytoplasmic CRY staining is higher in the flies that were stained at ZT23, whereas CRY in the rhabdomeres stays about the same (see Fig. 2 in the main manuscript).
